# Supplementary material for: Effect of the N-based ligands in copper complexes for depolymerisation of lignin
Source: Royal Society of Chemistry journal article supplement (doi:10.1039/c5nj03152d), 2016-01-01
Supplement: c5nj03152d1.pdf [file c5nj03152d1.pdf]

## Supplementary Information

### Effect of the *N*-based ligands in copper complexes for depolymerisation of lignin

Jinhuo Dai,<sup>a</sup> Sepa Nanayakkara,<sup>a</sup> Thomas C. Lamb,<sup>b</sup> Andrew J. Clark,<sup>b</sup> Si-Xuan Guo,<sup>a</sup> Jie Zhang,<sup>a</sup> Antonio F. Patti,<sup>a</sup> and Kei Saito<sup>\*a</sup>

<sup>a</sup>School of Chemistry, Monash University, Clayton, VIC 3800, Australia.

E-mail: Kei.Saito@monash.edu; Tel: +61-2-9905-4600; Fax: +61-3-9905-8501

<sup>b</sup>Department of Chemistry, University of Warwick, Gibbet Hill, Coventry, CV4 7AL, UK.

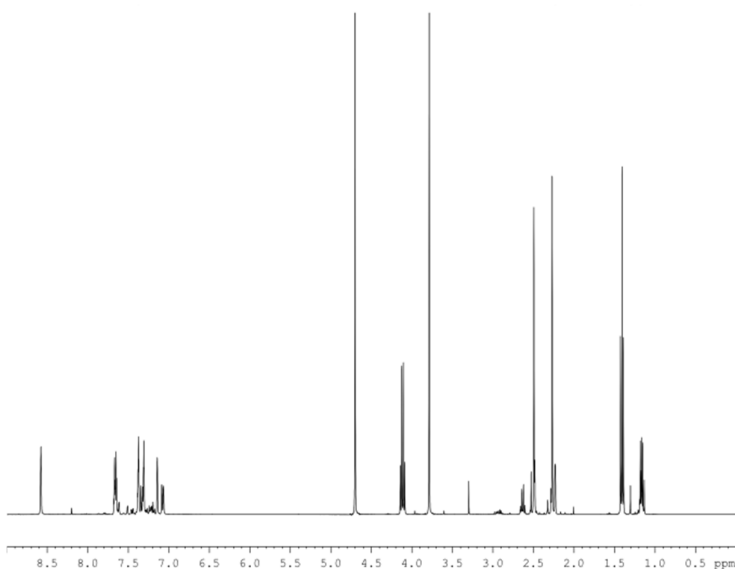

Figure S1: NMR spectrum of [emim][ABS]

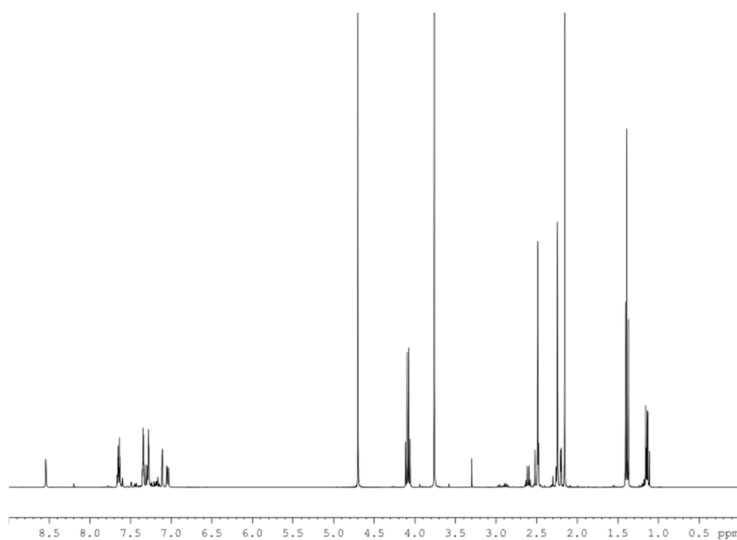

Figure S2: NMR spectrum of recovered [emim][ABS] after the reaction

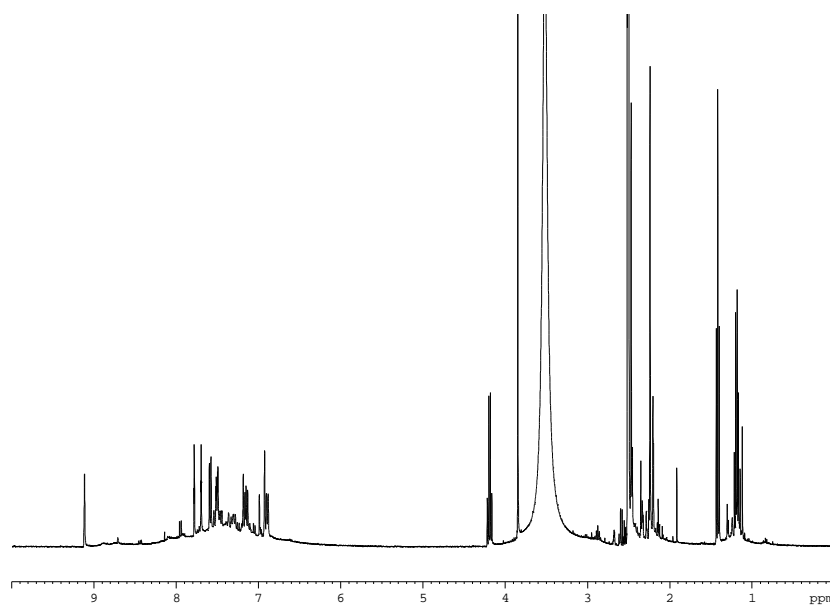

Figure S3. NMR spectrum of depolymerised lignin products

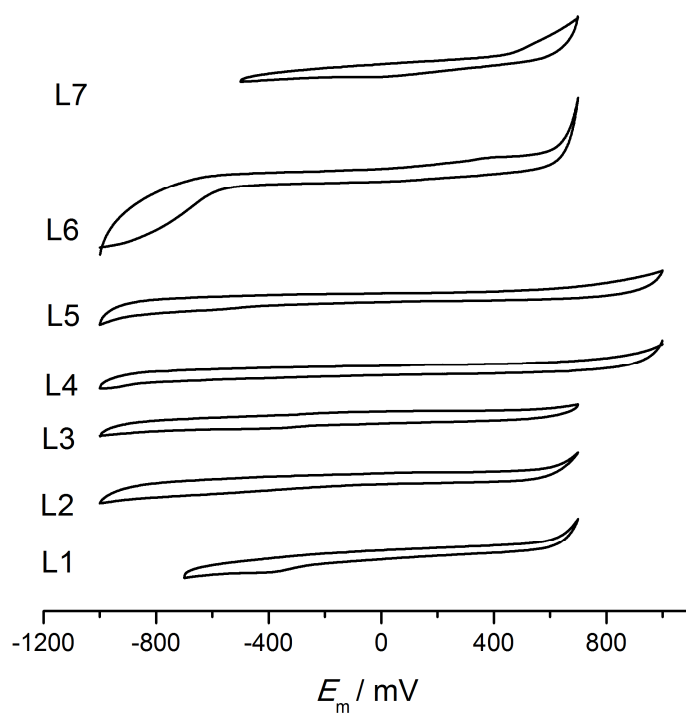

Figure S4. Cyclic voltammograms of different ligands
